# Supplementary material
Source: HighWire-hosted journal article supplement (https://erj.ersjournals.com/content/56/1/2002194)
Supplement: inline-supplementary-material-1 [file inline-supplementary-material-1.pdf]

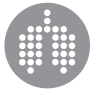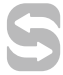

SHAREABLE PDF

AGORA

CORRESPONDENCE

ERJ European Respiratory Journal Eur Respir J 0903-1936/1399-3003 European Respiratory Society 10.1183/13993003.02194-2020 ERJ-02194-2020 AGORA CORRESPONDENCE

Impaired pulmonary function in discharged patients with COVID-19: more work ahead CORRESPONDENCE CORRESPONDENCE Impaired pulmonary function in discharged patients with COVID-19

Chen Ruchong<sup>1</sup>, Gao Yi<sup>1</sup>, Chen Mu<sup>2</sup>, Jian Wenhua<sup>1</sup>, Lei Chunliang<sup>2</sup>, Zheng Jinping<sup>1</sup>, Li Shiyue<sup>1</sup>,

<sup>1</sup>State Key Laboratory of Respiratory Disease, National Clinical Research Center for Respiratory Disease, Guangzhou Institute of Respiratory Health, First Affiliated Hospital of Guangzhou Medical University, Guangzhou, China. <sup>2</sup>Dept of Respiratory Medicine, Guangzhou Eighth People's Hospital, Guangzhou, China.

**Correspondence:** Shiyue Li, State Key Laboratory of Respiratory Disease, National Clinical Research Center for Respiratory Disease, Guangzhou Institute of Respiratory Health, First Affiliated Hospital of Guangzhou Medical University, Guangzhou, China. E-mail: lishiyue@188.com 202020205606062020110620202020

*From the authors:*

We are grateful for the opportunity to respond to the letter by S. Nusair, whom we thank for his interest and thoughtful remarks about our study on the abnormal pulmonary function in coronavirus disease 2019 (COVID-19) patients [1].
